# Supplementary material
Source: PubMed Central journal article supplement (PMC3766345)
Supplement: RS_477489_Supplementary_Table_1.pdf [file RS_477489_Supplementary_Table_1.pdf]

## Supplementary Table 1

Primers, Restriction Endonucleases and Fragment Lengths for  
*LEPR*, *SLC2A1* and *HK1* SNPs

| Gene          | SNP                   | Primers (5'-3')                                                    | Annealing Temperature | Restriction endonuclease | Restriction fragments                          |
|---------------|-----------------------|--------------------------------------------------------------------|-----------------------|--------------------------|------------------------------------------------|
| <i>LEPR</i>   | rs1137100             | F: GCTGGACTCTCAAAGAATAC<br>R: T <u>T</u> ACTGTTGAAACAAATGGC        | 56°C                  | HaeIII                   | Allele A: 196 bp<br>Allele G: 177 + 19 bp      |
|               | rs1137101             | F: CAAACTCAACGACACTCTCC<br>R: CCACTCTTAATACCCCCAGT                 | 56°C                  | BstEII                   | Allele A: 244 bp<br>Allele G: 184 + 60 bp      |
| <i>SLC2A1</i> | rs710218 <sup>#</sup> | F: GCTGAGAAATGGCCTTCCCTCAAT<br>R: GTCTGCCTTACTCAGCCCATGGGTC        | 68°C                  | HpyCH4V                  | Allele T: 339 bp<br>Allele A: 207+130 bp       |
|               | rs2229682             | F: TGTGGCCTTGTCATTTGTCCT<br>R: TTCTCCTCGTTGCGGTTGAT                | 58°C                  | BcnI                     | Allele A: 376 bp<br>Allele G: 297+79 bp        |
| <i>HK1</i>    | rs748235              | F: ATAAGGTATTC <sup>u</sup> CCGGCGTTTC<br>R: ATTGTTGTGCGTCTGCTTCCT | 58°C                  | Eco130I                  | Allele A: 157+101 bp<br>Allele G: 101+79+78 bp |
|               | rs16926246            | F: GTGACAGCCTTGTTCCTTTTC<br>R: CTAAGCTCCTCCATCCAAATC               | 58°C                  | BbvI                     | Allele C: 260 bp<br>Allele T: 137+123 bp       |

<sup>#</sup>PCR-RFLP described by Hodgkinson et al. (2005).

\*Underlined nucleotide generates the site recognized by HaeII restriction endonuclease in the presence of G allele of rs1137100.
